## ERK5 is required for VEGF-mediated survival and tubular morphogenesis of primary human microvascular endothelial cells

Owain LIÿr Roberts, Katherine Holmes, Jürgen Müller, Darren A. E. Cross and Michael J. Cross

Journal of Cell Science 123, 3413  
© 2010. Published by The Company of Biologists Ltd  
doi:10.1242/jcs.080663

There were errors published in *J. Cell Sci.* **123**, 3189-3200.

In Fig. 4, the concentration of staurosporine (STS) was mistakenly given as 50 mM, rather than the correct concentration of 50 nM (lines 9 and 15 in the legend).

Moreover, the first sentence in the ‘Signal transduction inhibitors’ section in the Materials and Methods (page 3198) should read:

Rapamycin, staurosporine and wortmannin were purchased from Calbiochem (Merck Chemicals Ltd, Nottingham, UK) and reconstituted in DMSO (Sigma).

The authors apologise for these mistakes.
